# Supplementary material for: Hepatic small extracellular vesicles promote microvascular endothelial hyperpermeability during NAFLD via novel-miRNA-7
Source: PubMed Central journal article supplement (PMC8626954; doi:10.1186/s12951-021-01137-3), 2021-11-27

# Supplementary Figure 1

A

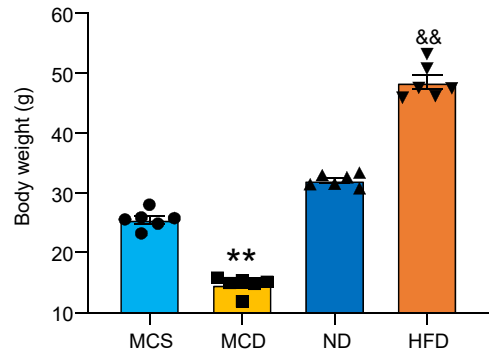

B

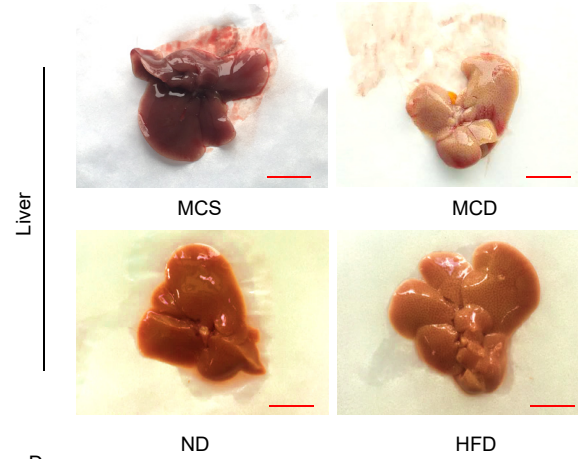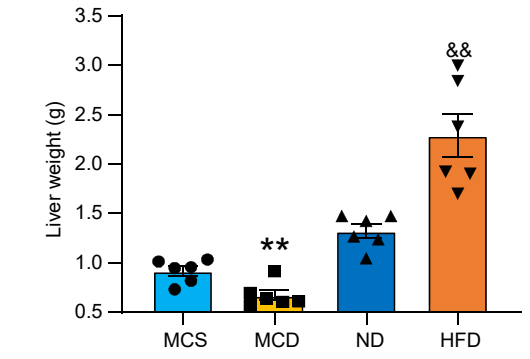

C

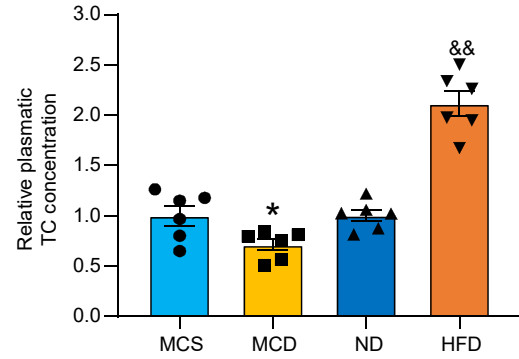

D

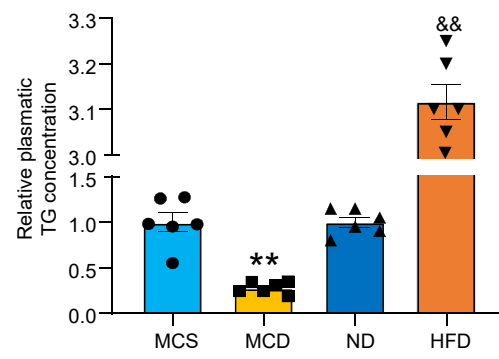

E

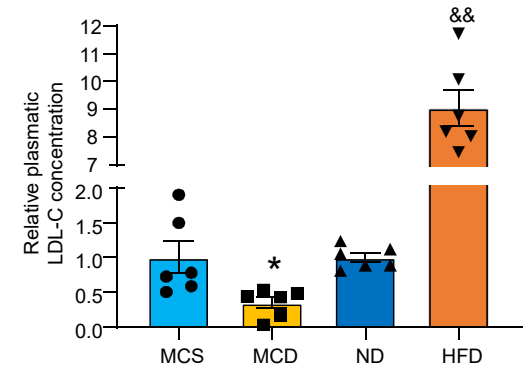

# Supplementary Figure 2

A

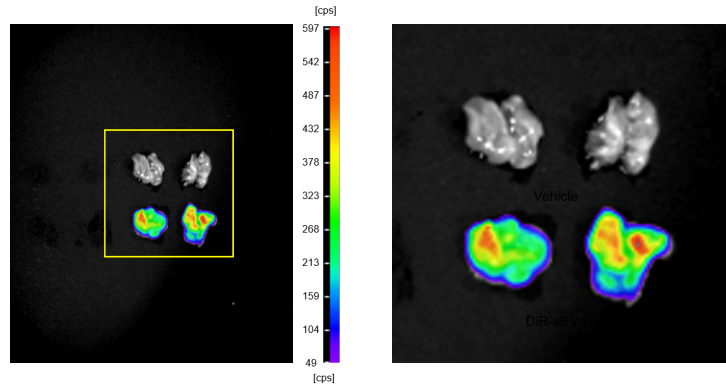

B

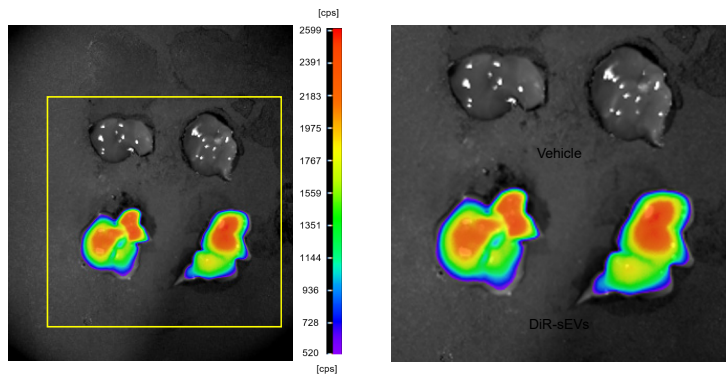

C

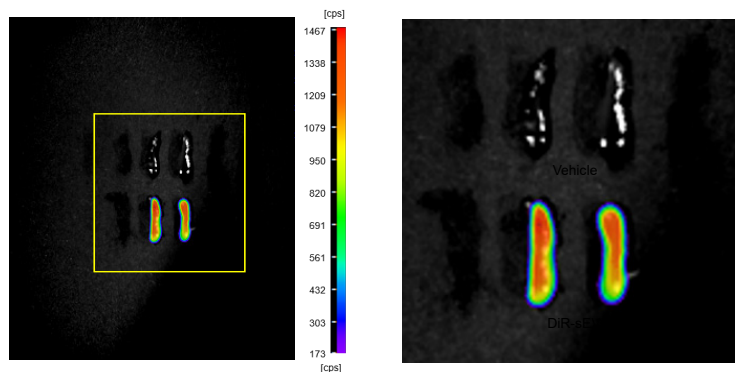

D

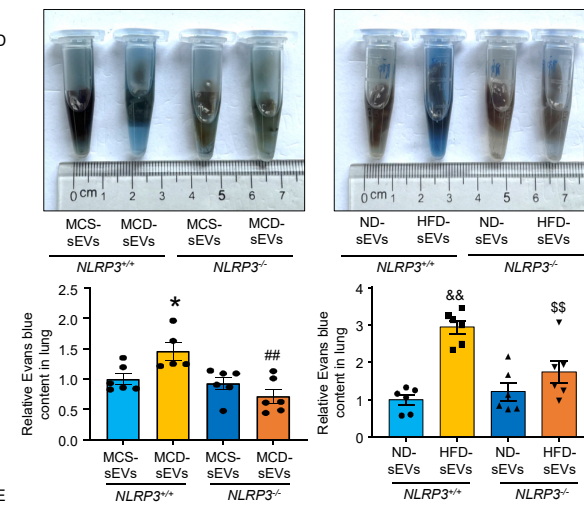

E

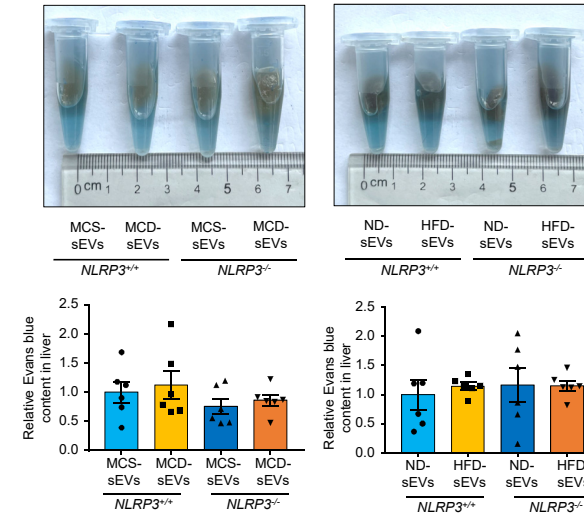

F

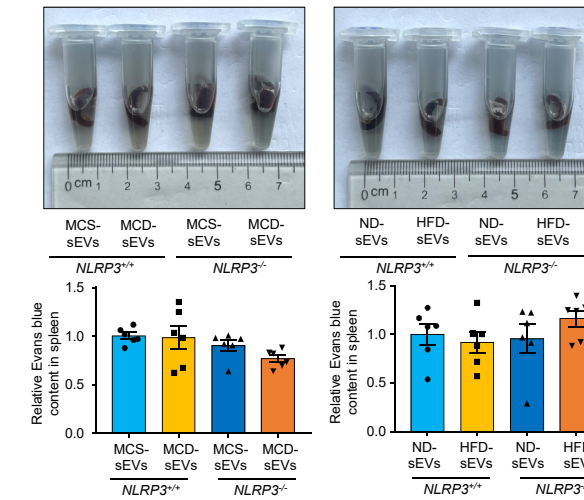

# Supplementary Figure 3

A

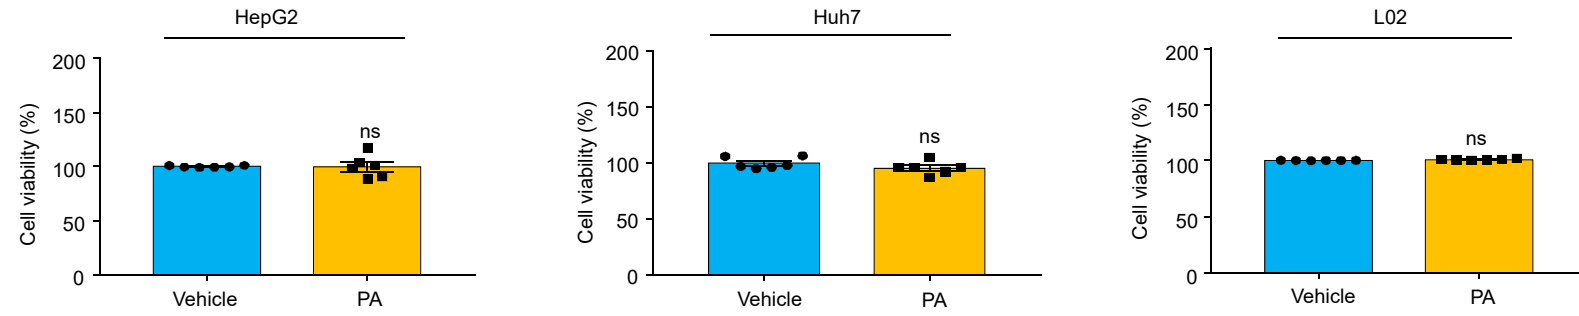

B

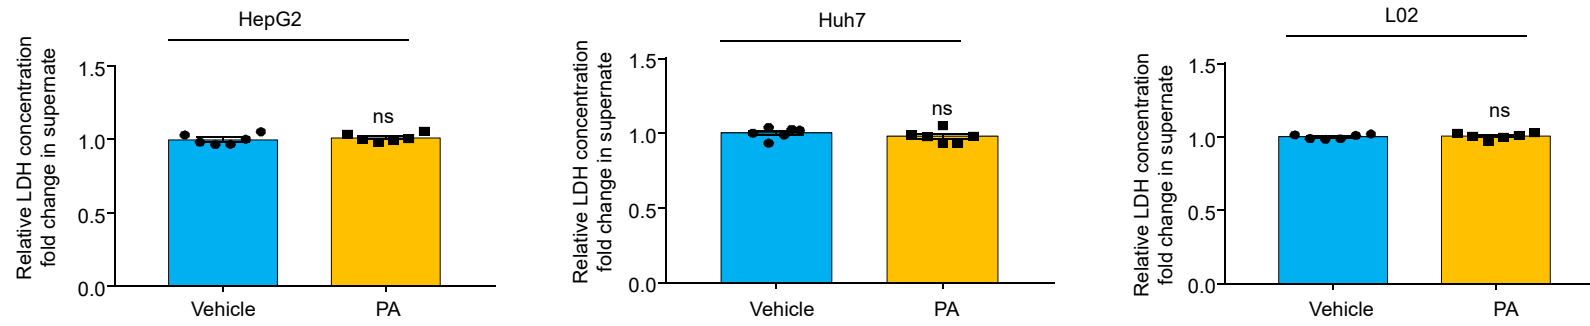

C

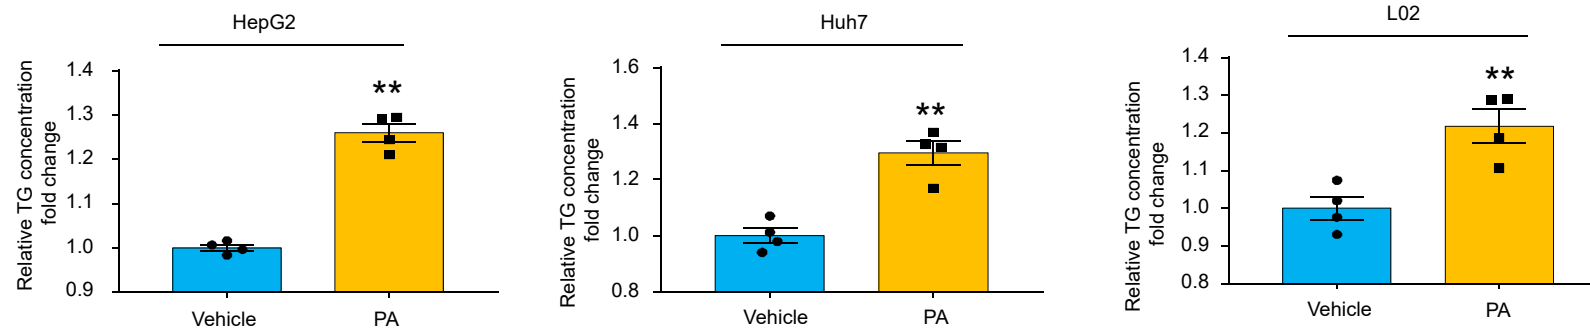

D

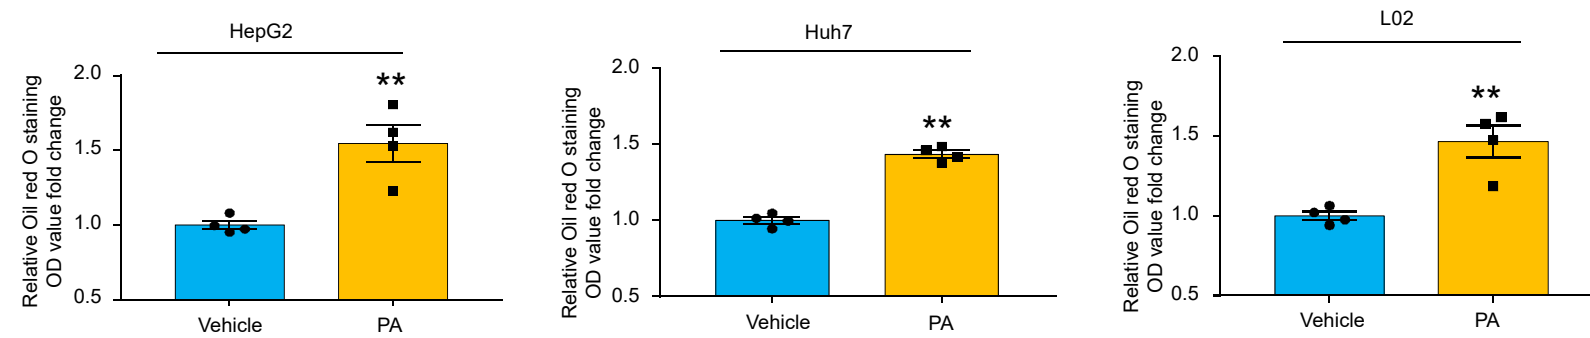

A

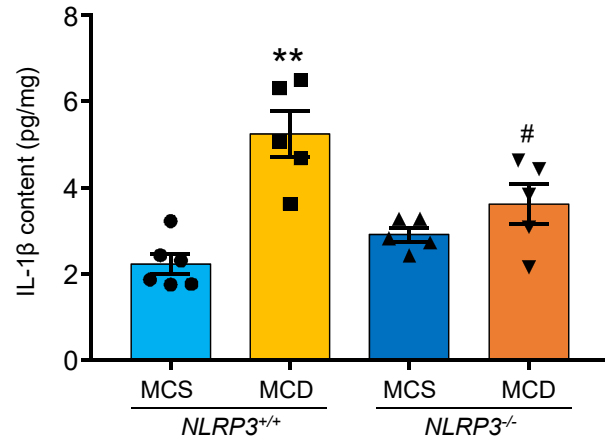

B

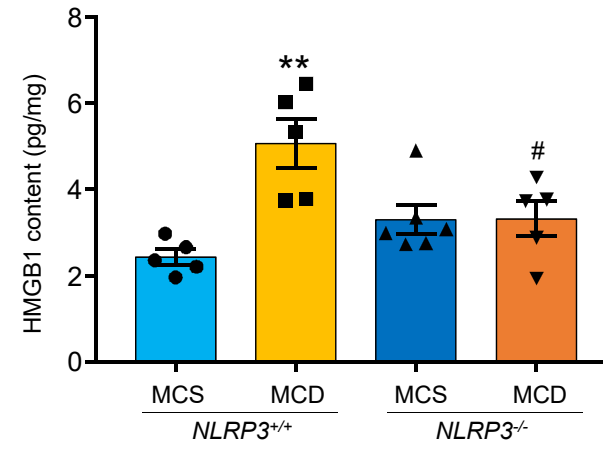

C

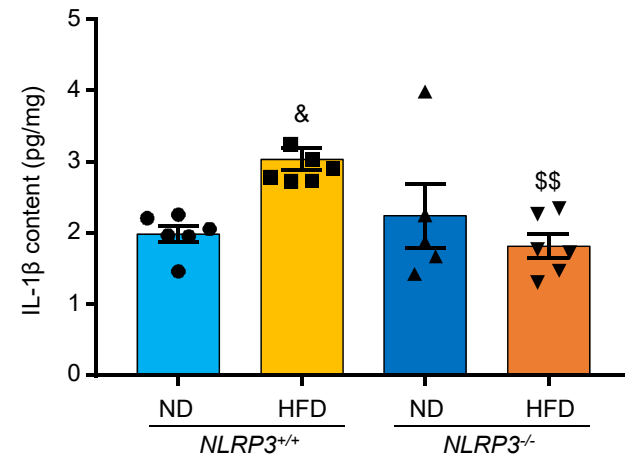

D

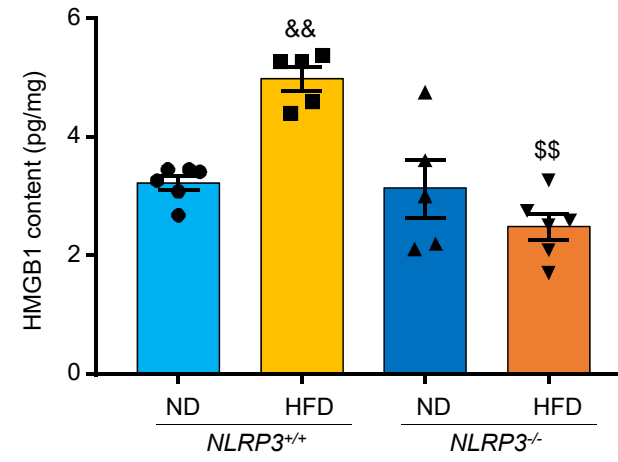

A

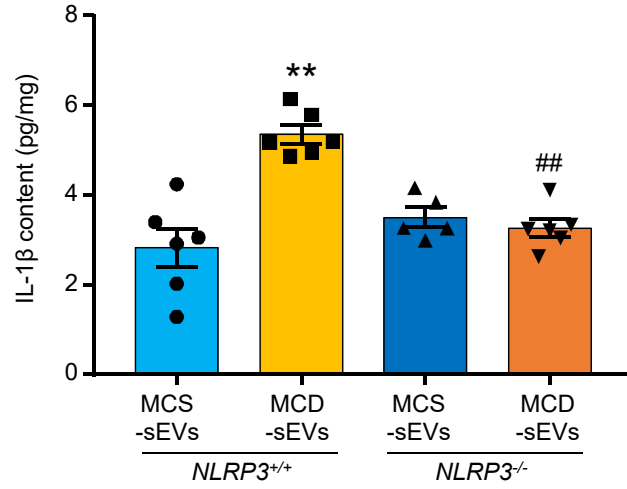

B

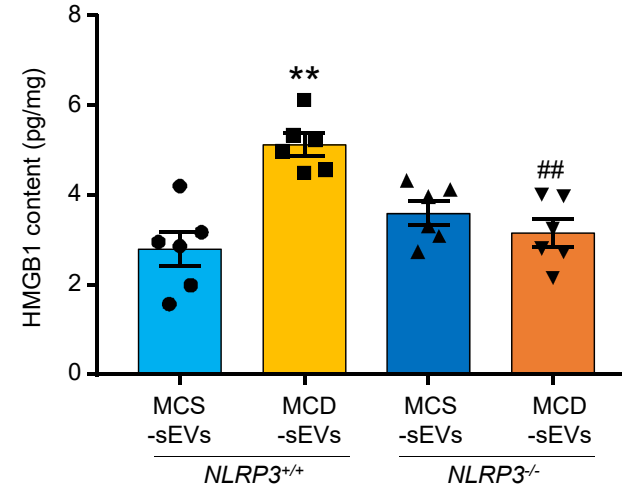

C

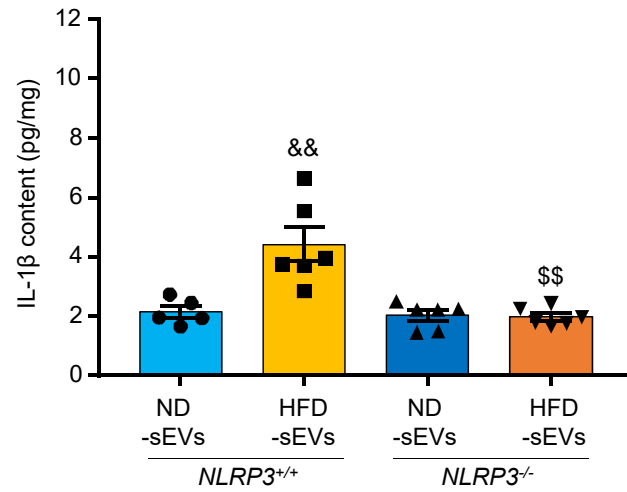

D

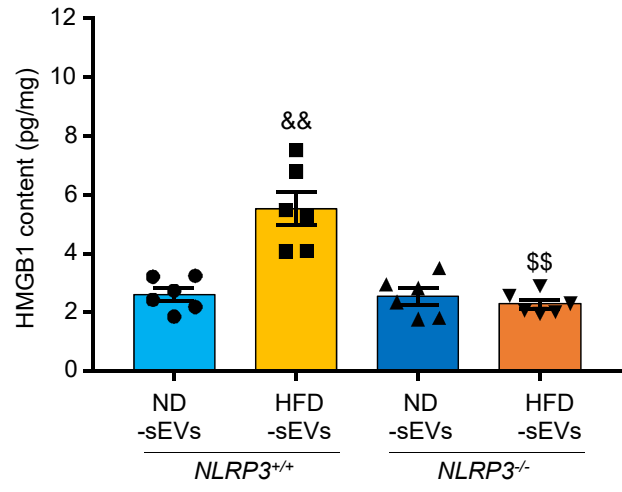

A

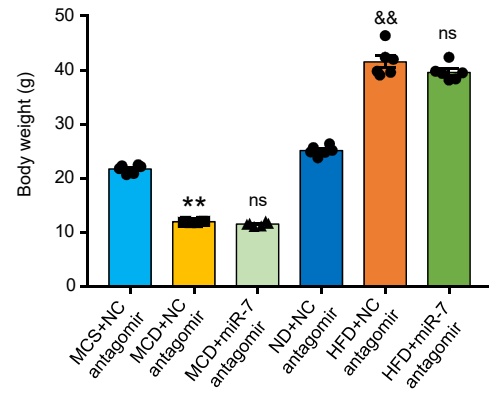

B

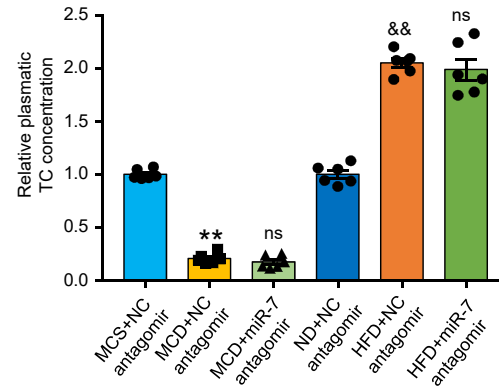

C

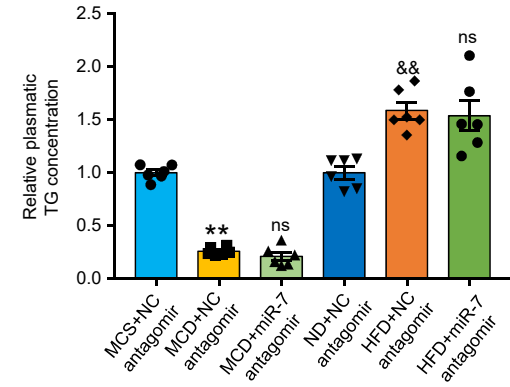

D

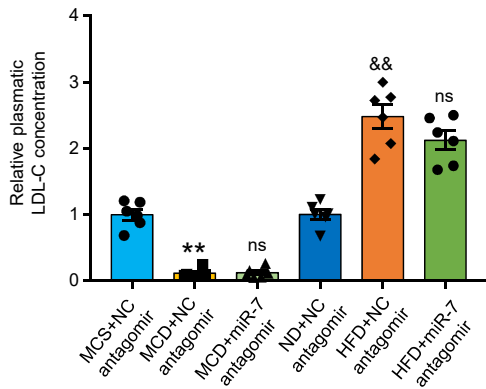

E

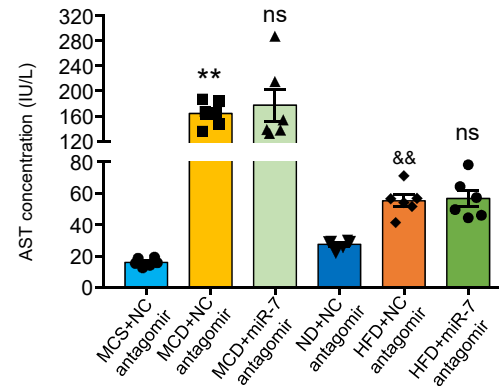

F

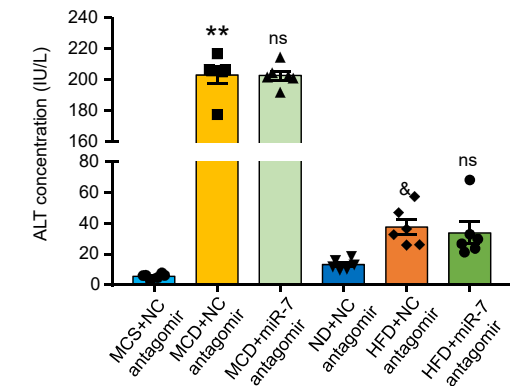

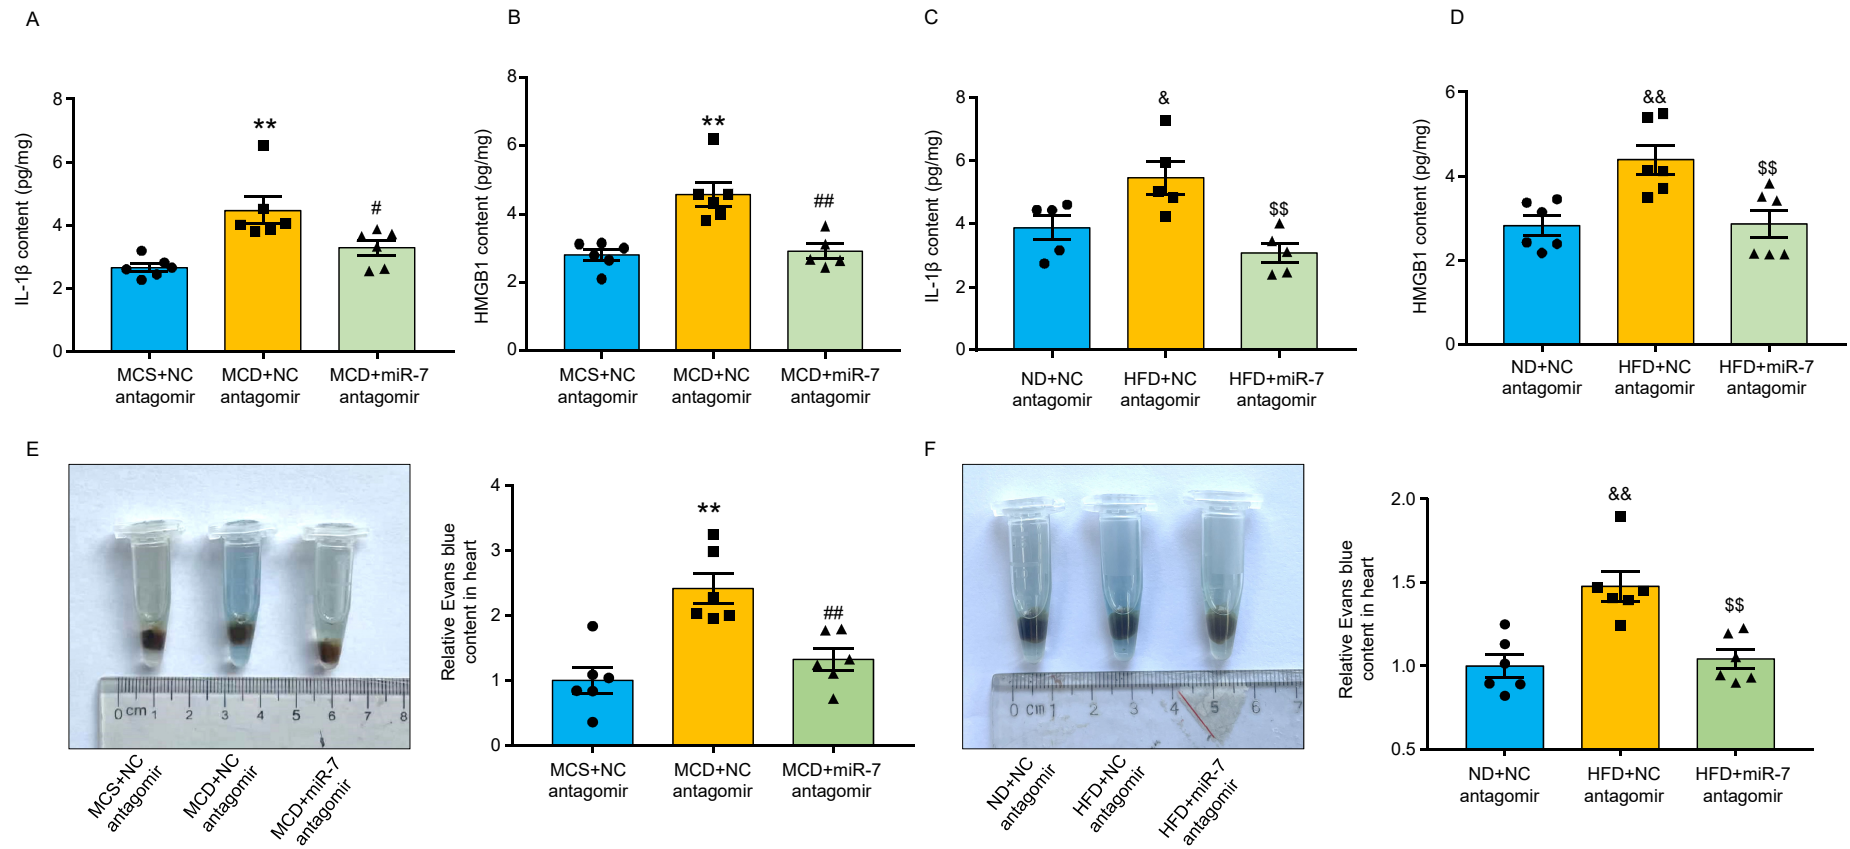

A

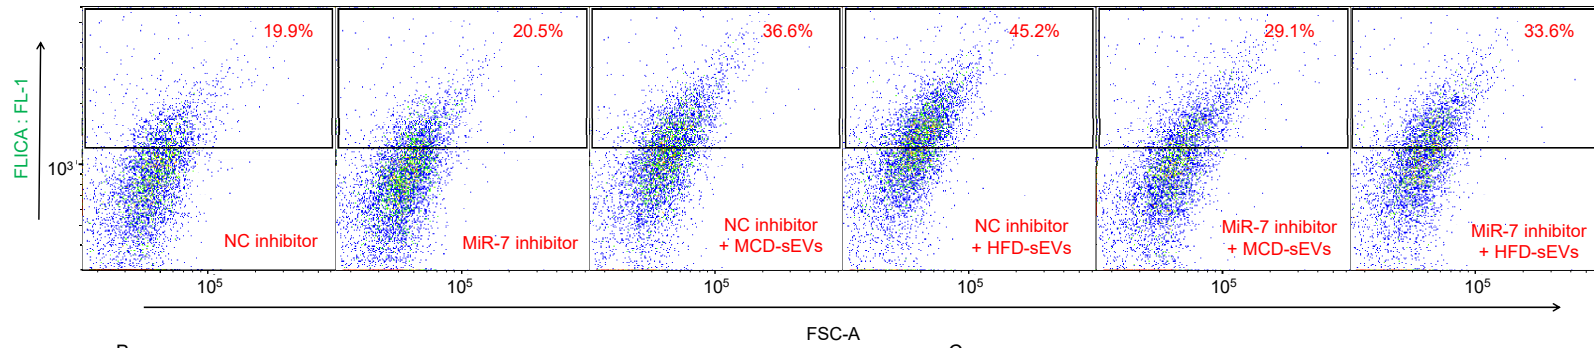

B

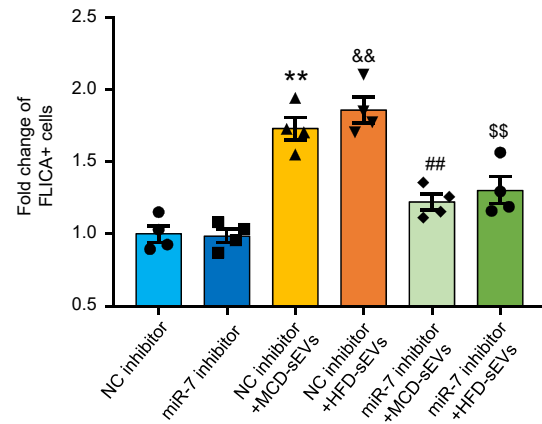

C

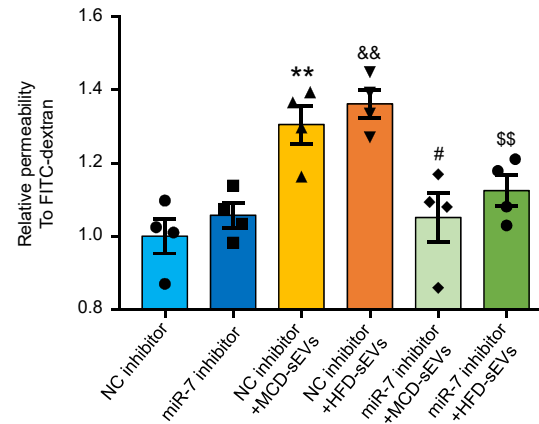

D

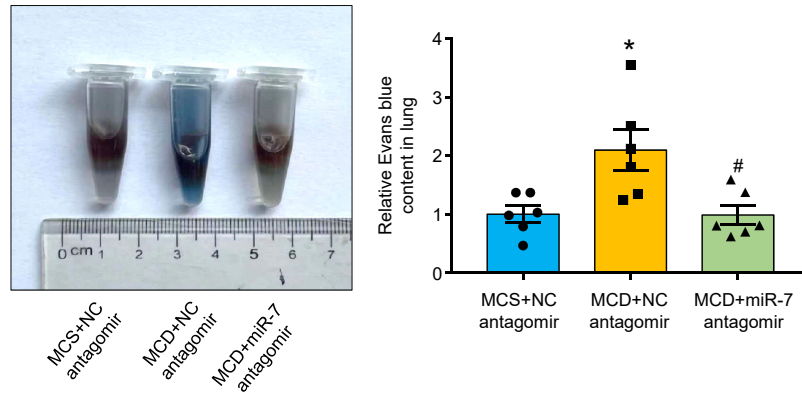

E

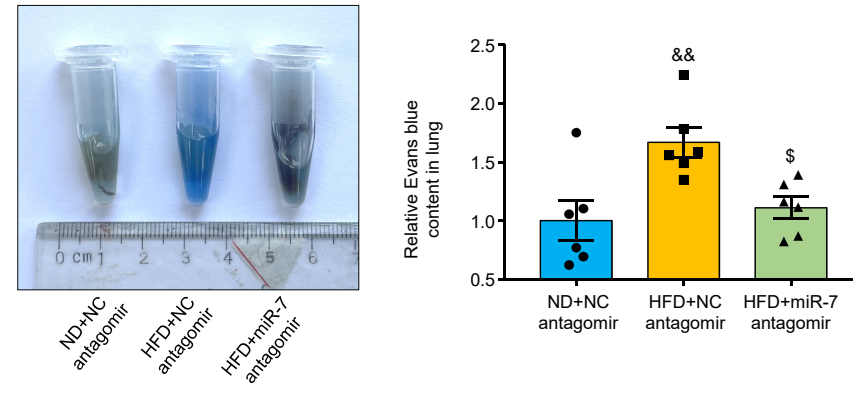



# Supplementary Figure 9

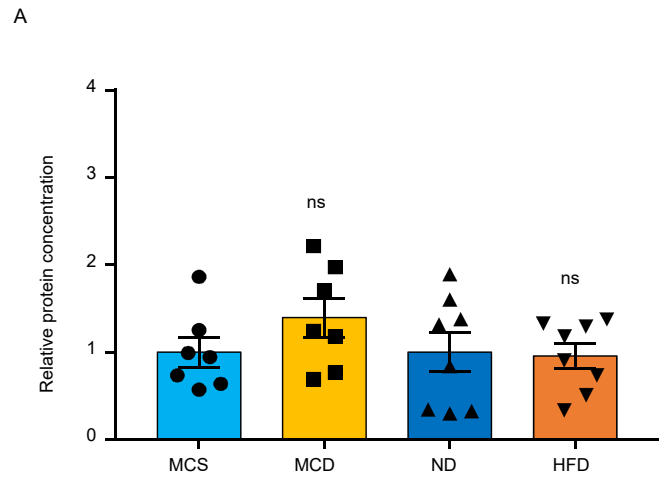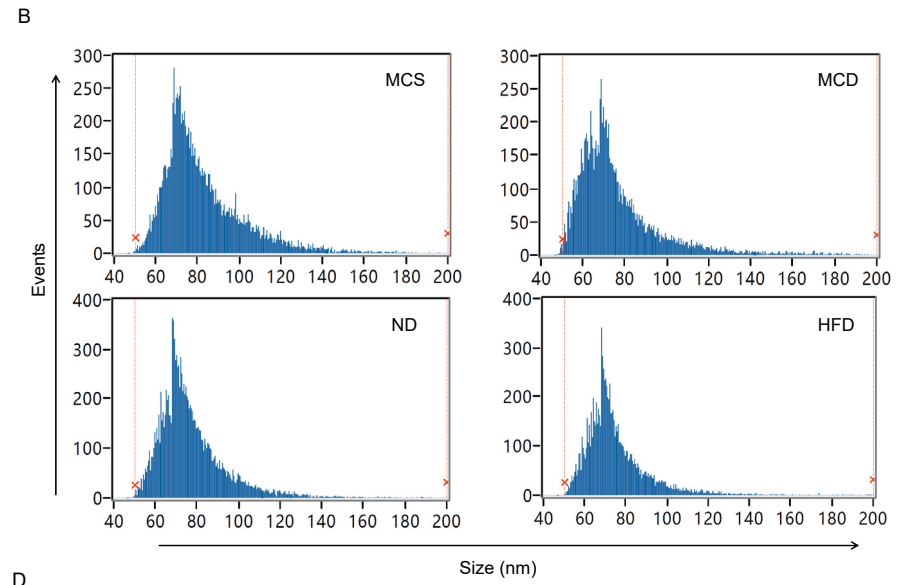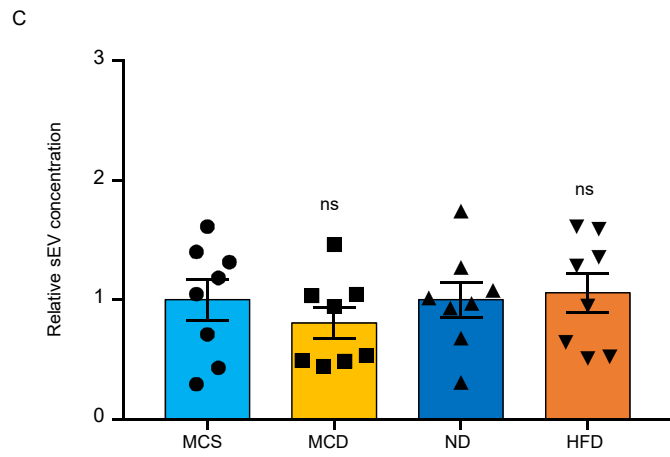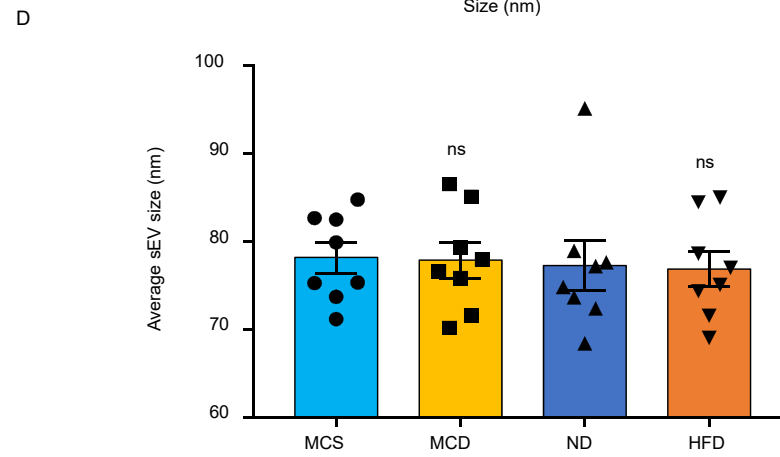

# Supplementary Figure 10

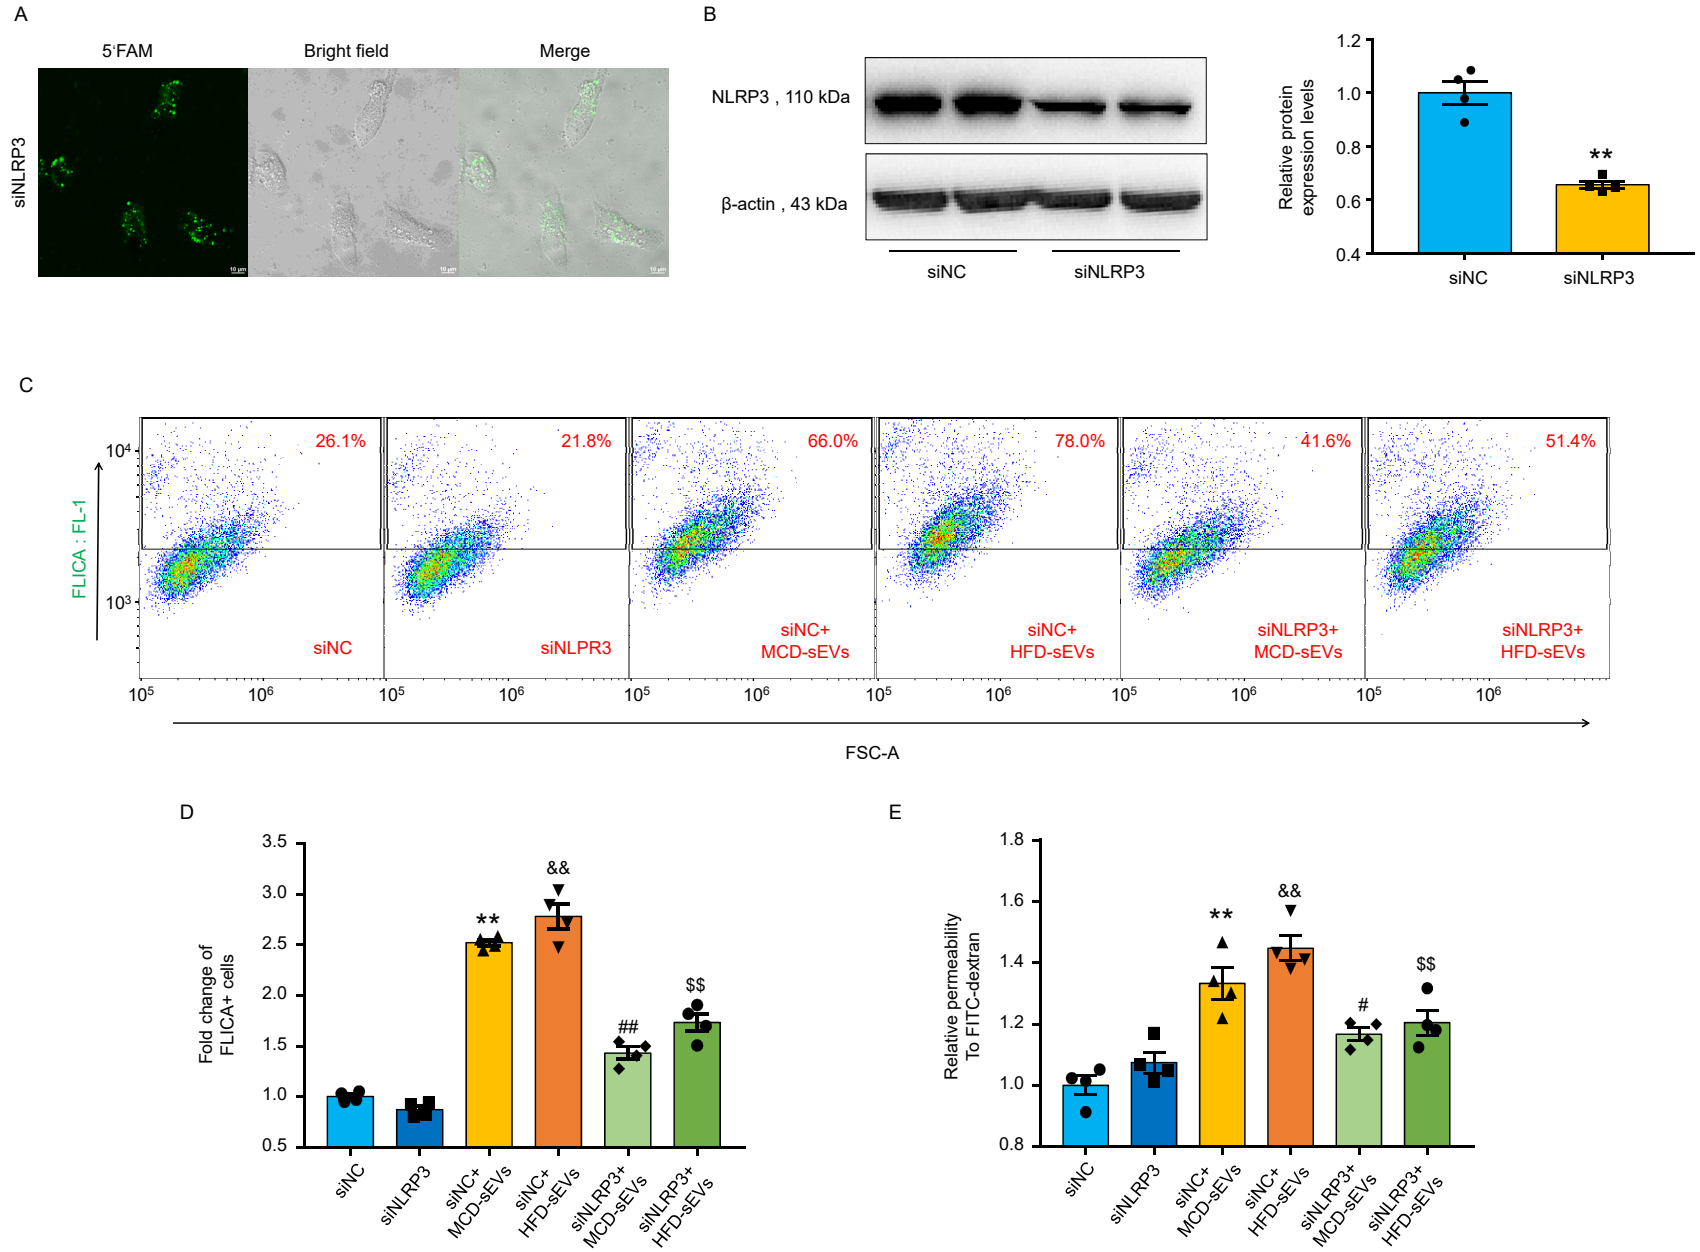

A

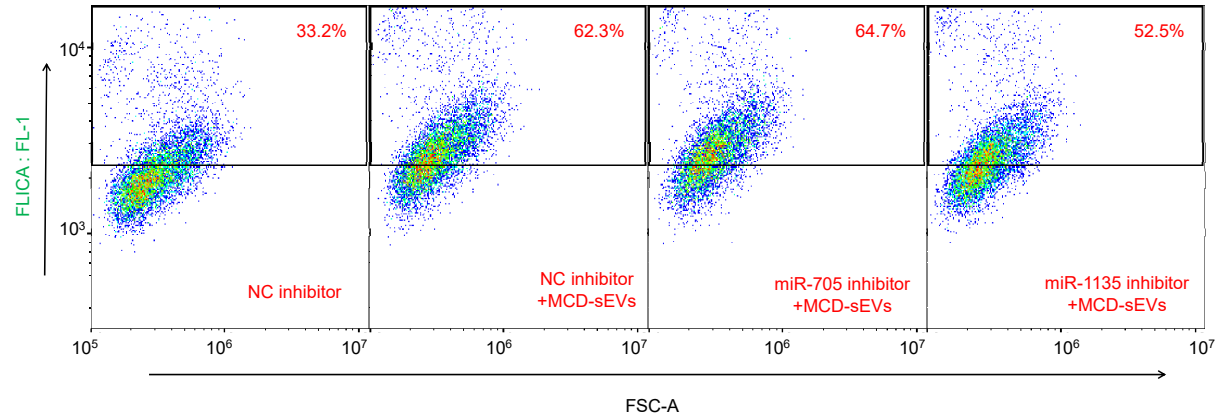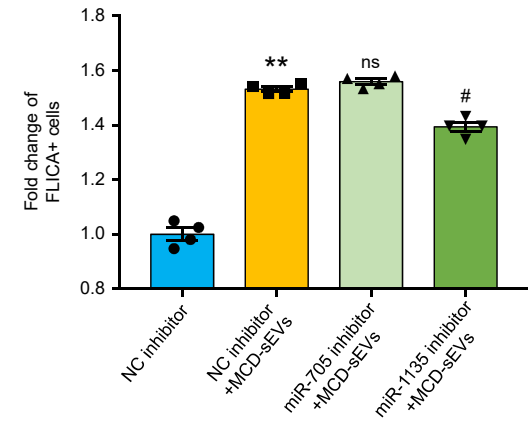

B

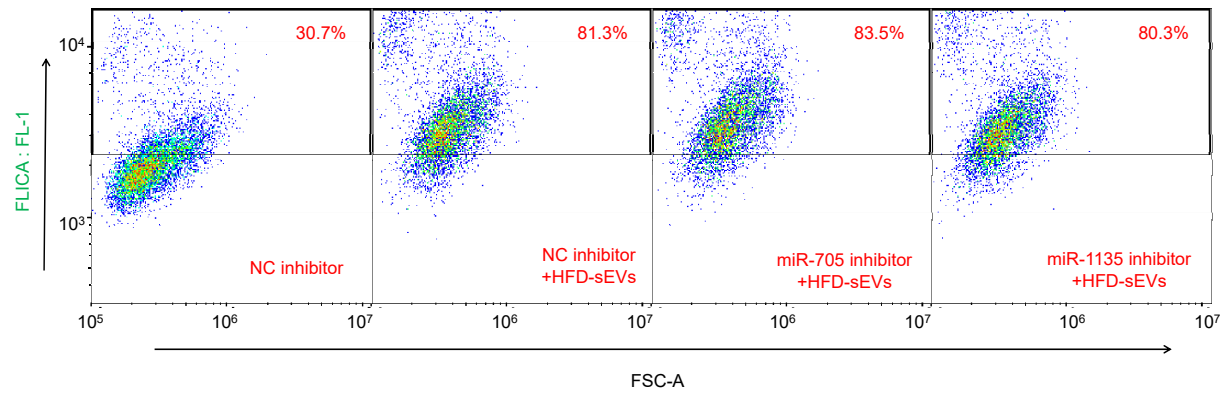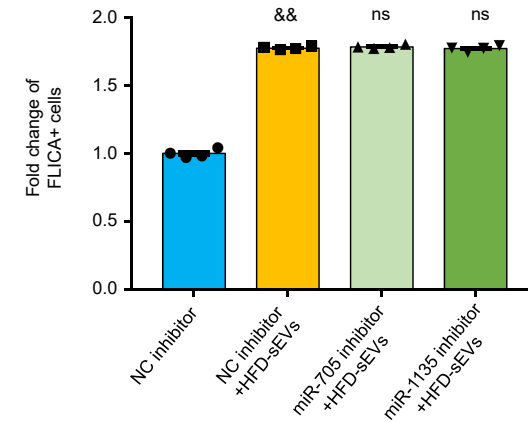

Supplementary Figure 12

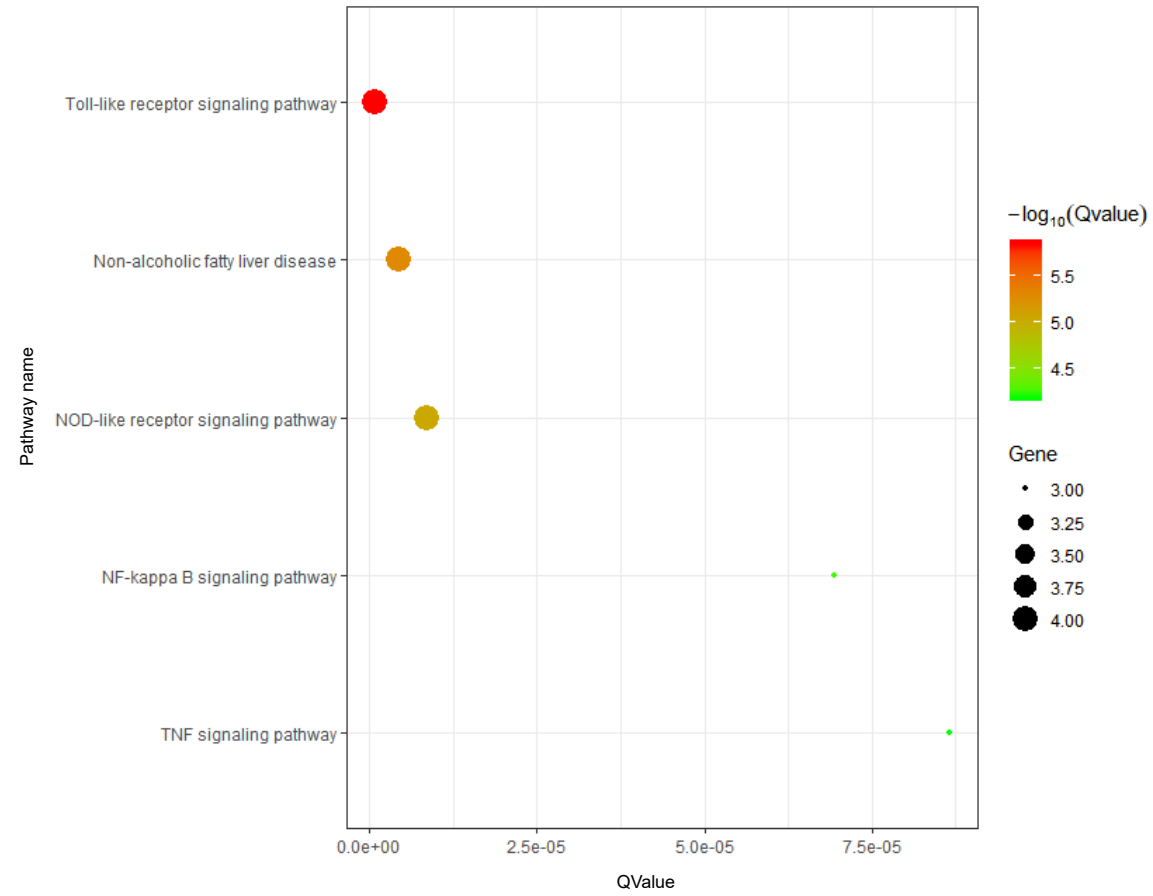

Supplementary Figure 13

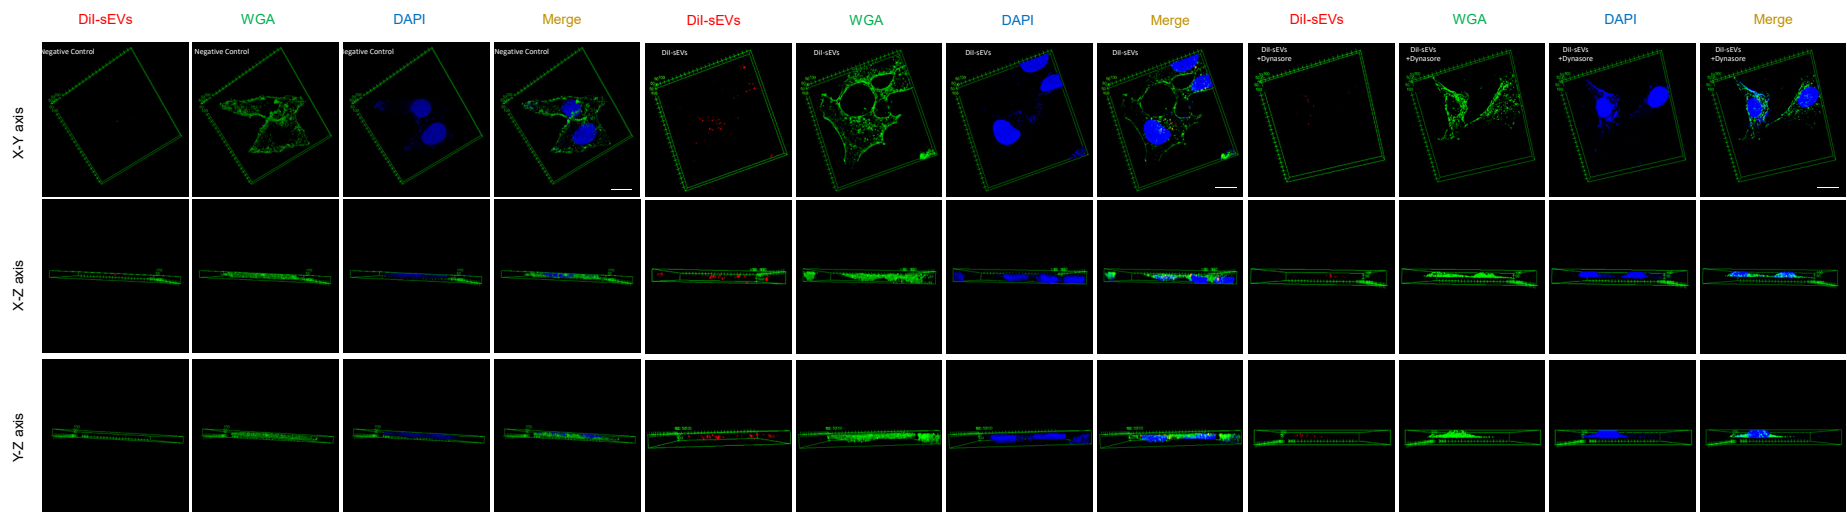

Supplement: 12951_2021_1137_MOESM1_ESM.pdf [file 12951_2021_1137_MOESM1_ESM.pdf]
