# Supplementary material for: Hepatic small extracellular vesicles promote microvascular endothelial hyperpermeability during NAFLD via novel-miRNA-7
Source: PubMed Central journal article supplement (PMC8626954; doi:10.1186/s12951-021-01137-3), 2021-11-27
Supplement: 12951_2021_1137_MOESM2_ESM.pdf [file 12951_2021_1137_MOESM2_ESM.pdf]

## Supplementary Table 1. Oligonucleotides

---

|                                                           |                                                                            |
|-----------------------------------------------------------|----------------------------------------------------------------------------|
| novel-miR-7 stem-loop primer                              | 5'-GTCGTATCCAGTGCAGGGTCCGAGG<br>TATTCGCACTGGATACGACCACTGA-3'               |
| novel-miR-7 primer                                        | F: 5'- CGAGGGGCTGGAGAGATAGC-3'<br>R: 5'- AGTGCAGGGTCCGAGGTATT-3'           |
| U6 stem-loop primer                                       | 5'-GTCGTATCCAGTGCAGGGTCCGAGG<br>TATTCGCACTGGATACGACAAAATA-3'               |
| U6 primer                                                 | F: 5'- AGAGAAGATTAGCATGGCCCCTG -3'<br>R: 5'- ATCCAGTGCAGGGTCCGAGG -3'      |
| novel-miR-7 mimic                                         | F: 5'-AGGGGCUGGAGAGAUAGCUCAGUG-3'<br>R: 5'-CUGAGCUAUCUCUCCAGCCCCUUU-3'     |
| negative control mimic                                    | F: 5'-UUCUCCGAACGUGUCACGUTT-3'<br>R: 5'-ACGUGACACGUUCGGAGAATT-3'           |
| novel-miR-7 inhibitor/<br>novel-miR-7 antagomir           | 5'-CACUGAGCUAUCUCUCCAGCCCCU-3'                                             |
| negative control inhibitor/<br>negative control antagomir | 5'-CAGUACUUUUGUGUAGUACAA-3'                                                |
| pGL3-LAMP1-3'UTR plasmid                                  | F: 5'-GCTCTAGAAGCCTGGTGGGCAGG-3'<br>R: 5'-GCTCTAGAGACAGACAAAGAAGGAGACTT-3' |
| NLRP3 siRNA                                               | F: 5'-GGUUCUGAGCUCCAACCAUTT-3'<br>R: 5'-AUGGUUGGAGCUCAGAACCTT-3'           |
| negative control siRNA                                    | F: 5'-UUCUCCGAACGUGUCACGUTT-3'<br>R: 5'-ACGUGACACGUUCGGAGAATT-3'           |
| novel-miR-705 inhibitor                                   | 5'-AGCUCCACCACUGAGCUACAUCCCC-3'                                            |
| novel-miR-1135 inhibitor                                  | 5'-GCCAACAUCUCCAAGAGCAUCUCU-3'                                             |

---
