# Supplementary material for: Hepatic small extracellular vesicles promote microvascular endothelial hyperpermeability during NAFLD via novel-miRNA-7
Source: PubMed Central journal article supplement (PMC8626954; doi:10.1186/s12951-021-01137-3), 2021-11-27
Supplement: 12951_2021_1137_MOESM3_ESM.pdf [file 12951_2021_1137_MOESM3_ESM.pdf]

**Supplementary Table 2. Raw reads of the top ten differentially expressed miRNAs from deep-sequencing**

| MicroRNA       | MCS_01 | MCS_02 | MCS_03 | MCD_01 | MCD_02 | MCD_03 | FDR*     | log2FC <sup>#</sup> |
|----------------|--------|--------|--------|--------|--------|--------|----------|---------------------|
| novel_miR_7    | 0      | 7      | 1      | 137    | 123    | 168    | 4.30E-26 | 5.952173            |
| novel_miR_2084 | 0      | 0      | 1      | 5      | 12     | 12     | 0.004957 | 5.047025            |
| novel_miR_1135 | 2      | 1      | 1      | 33     | 29     | 39     | 1.42E-11 | 4.847630            |
| mmu-miR-27a-5p | 0      | 1      | 0      | 6      | 6      | 13     | 0.000228 | 4.820164            |
| novel_miR_830  | 1      | 0      | 0      | 8      | 8      | 7      | 0.000485 | 4.777667            |
| novel_miR_1069 | 0      | 1      | 0      | 10     | 4      | 9      | 0.000494 | 4.680046            |
| novel_miR_705  | 3      | 1      | 0      | 25     | 16     | 50     | 1.69E-06 | 4.626626            |
| novel_miR_1383 | 0      | 0      | 1      | 4      | 7      | 7      | 0.003439 | 4.348673            |
| novel_miR_2352 | 0      | 0      | 1      | 3      | 4      | 12     | 0.018606 | 4.284491            |
| novel_miR_292  | 0      | 1      | 0      | 7      | 2      | 8      | 0.005338 | 4.196108            |

\*FDR: false discovery rate, #FC: fold change
